# Supplementary material for: Amyloid fibrils are “alive”: spontaneous refolding from one polymorph to another
Source: Royal Society of Chemistry journal article supplement (doi:10.1039/b926758a), 2010-01-01
Supplement: b926758a.pdf [file b926758a.pdf]

## [Supporting Information]

### Amyloid Fibrils are “Alive”: Spontaneous Refolding from One Polymorph to Another

Dmitry Kurouski, William Lauro, and Igor K. Lednev

Department of Chemistry, University at Albany, SUNY, 1400 Washington Ave., Albany, NY 12222, USA

Corresponding author. E-mail: lednev@albany.edu

#### Experimental:

##### *Preparation of apo- $\alpha$ -lactalbumin fibrils*

Bovine apo- $\alpha$ -lactalbumin (Sigma, St.Louis, MO) solution (5 mg/ml, 150mM NaCl, pH 2.0 adjusted by adding HCl) was incubated at 37 °C with constant stirring for 72 h. The incubation was terminated by separating the gelatinous fraction by centrifugation at 14000g for 30 min at 37 °C. The separated fibrils were redispersed in pH 2.0 HCl solutions with and without added NaCl.

##### *Atomic force microscopy (AFM)*

Redispersed fibrils were diluted with aqueous pH 2.0 HCl solution in a 1:400 ratio and deposited onto a freshly-cleaved mica. AFM imaging was performed by using a MFP-3D™ Bio Asylum Research microscope (Asylum Research, CA, USA) in non-contact mode with Olympus AC160TS tips.

##### *Deep UV resonance Raman spectroscopy*

197-nm excited DUVRR spectra were measured using a home-built Raman spectrometer as described elsewhere.<sup>29</sup> A spinning NMR tube with a magnetic stirrer inside was used for sampling. All reported Raman spectra are an average of at least three independent measurements. GRAMS/AI 7.0 software (Thermo Galactic, Salem, NH) was used for spectral data processing.

##### *H/D exchange*

The method of hydrogen-deuterium exchange combined with DUVRR spectroscopy is described in detail elsewhere<sup>15</sup>. Briefly, samples (1mL) of fibrils dispersed in water were centrifuged at 14 000g for 30 min. The precipitate was divided into two parts, each of which were washed two times, one with D<sub>2</sub>O and the other with H<sub>2</sub>O, by subsequent spinning-redispersion. The washed dispersions (in D<sub>2</sub>O and H<sub>2</sub>O) were used for Raman spectroscopic measurements.

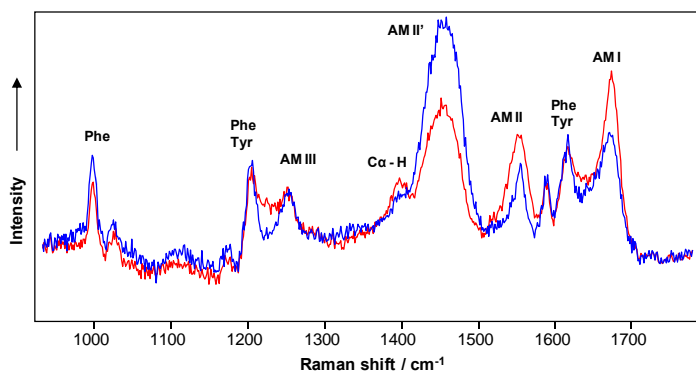

**Figure S1.** DUVRR spectra of fibril Polymorphs I (red) and II (blue) in D<sub>2</sub>O. H-D exchange of Polymorph II was performed after fibril incubation in H<sub>2</sub>O for 7 hours at 25 °C.
